1 **The crystal structure of SnTox3 from the necrotrophic fungus *Parastagonospora nodorum***  
2 **reveals a unique effector fold and insights into Kex2 protease processing of fungal effectors**

3 Megan A. Outram<sup>1,2</sup>, Yi-Chang Sung<sup>1</sup>, Daniel Yu<sup>1</sup>, Bayantes Dagvadorj<sup>1</sup>, Sharmin A. Rima<sup>1</sup>,  
4 David A. Jones<sup>1</sup>, Daniel J. Ericsson<sup>1,3</sup>, Jana Sperschneider<sup>4</sup>, Peter S. Solomon<sup>1</sup>, Bostjan Kobe<sup>2</sup>,  
5 Simon J. Williams<sup>1§</sup>

6 <sup>1</sup>Research School of Biology, The Australian National University, Canberra, ACT 2601, Australia

7 <sup>2</sup>School of Chemistry and Molecular Biosciences, Institute for Molecular Bioscience and  
8 Australian Infectious Diseases Research Centre, University of Queensland, Brisbane, Queensland  
9 4072, Australia, <sup>3</sup>Australian Synchrotron, Macromolecular Crystallography, Clayton, Victoria  
10 3168, Australia, <sup>4</sup>Biological Data Science Institute, The Australian National University, Canberra,  
11 ACT 2601, Australia

12 <sup>§</sup>Corresponding author: Email: [simon.williams@anu.edu.au](mailto:simon.williams@anu.edu.au)

## 13 **Summary**

- 14 • Plant pathogens cause disease through secreted effector proteins, which act to modulate host  
15 physiology and promote infection. Typically, the sequences of effectors provide little functional  
16 information and further targeted experimentation is required. Here, we utilised a structure/function  
17 approach to study SnTox3, an effector from the necrotrophic fungal pathogen *Parastagonospora*  
18 *nodorum*, which causes cell death in wheat-lines carrying the sensitivity gene *Snn3*.
- 19 • We developed a workflow for the production of SnTox3 in a heterologous host that enabled  
20 crystal structure determination. We show this approach can be successfully applied to effectors  
21 from other pathogenic fungi. Complementing this, an *in-silico* study uncovered the prevalence of  
22 an expanded subclass of effectors from fungi.
- 23 • The  $\beta$ -barrel fold of SnTox3 is a novel fold among fungal effectors. We demonstrate that  
24 SnTox3 is a pre-pro-protein and that the protease Kex2 removes the pro-domain. Our *in-silico*  
25 studies suggest that Kex2-processed pro-domain (designated here as K2PP) effectors are common  
26 in fungi, and we demonstrate this experimentally for effectors from *Fusarium oxysporum* f sp.  
27 *lycopersici*.
- 28 • We propose that K2PP effectors are highly prevalent among fungal effectors. The identification  
29 and classification of K2PP effectors has broad implications for the approaches used to study their  
30 function in fungal virulence.

## 31 **Keywords**

32 Effectors, *Fusarium oxysporum* f sp. *lycopersici*, Kex2 protease, necrotrophic effectors,  
33 *Parastagonospora nodorum*, secreted in xylem effectors (SIX), plant immunity, pro-domains.

34

## 35 Introduction

36 *Parastagonospora nodorum* is the causal agent of the wheat disease septoria nodorum blotch  
37 (SNB) and is responsible for significant yield losses globally (Murray & Brennan, 2009; Crook *et*  
38 *al.*, 2012; Figueroa *et al.*, 2018). *P. nodorum* is a necrotrophic pathogen that thrives on dead or  
39 dying host tissue to cause disease and to reproduce. While initially believed to utilise a suite of  
40 cell-wall degrading and lytic enzymes to cause disease, it is now well established that *P. nodorum*  
41 secretes a number of proteinaceous effectors (also known as necrotrophic effectors/NEs, or host-  
42 selective toxins) (Oliver *et al.*, 2012; McDonald & Solomon, 2018). These effectors promote  
43 disease through recognition by corresponding susceptibility gene products present in wheat leading  
44 to a programmed cell death response (Oliver *et al.*, 2012). This process is termed effector-triggered  
45 susceptibility, and is considered the inverse of the interaction that occurs between biotrophic plant  
46 pathogens and their hosts, where recognition of effectors by a corresponding resistance gene  
47 product leads to localised programmed cell death in infected cells (Jones & Dangl, 2006). This is  
48 an effective mechanism against biotrophic pathogens, which derive their nutrients from living cells  
49 and tissues; however, for necrotrophic pathogens cell death is advantageous.

50 The genetic basis of the *P. nodorum*-wheat interaction has been relatively well described, with a  
51 total of nine effector-susceptibility gene interactions identified (Liu *et al.*, 2004; Sarma *et al.*, 2005;  
52 Friesen *et al.*, 2006; Friesen *et al.*, 2007; Abeysekara *et al.*, 2009; Liu *et al.*, 2009; Friesen *et al.*,  
53 2012; Liu *et al.*, 2012; Gao *et al.*, 2015; Shi *et al.*, 2015). To date, three effectors have been cloned  
54 from *P. nodorum*, SnToxA, SnTox1 and SnTox3; they can induce necrosis, even in the absence of  
55 the pathogen, in wheat lines that carry *Tsn1*, *Snn1* and *Snn3*, respectively (Ballance *et al.*, 1989;  
56 Ciuffetti *et al.*, 1997; Friesen *et al.*, 2006; Liu *et al.*, 2009; Faris *et al.*, 2010; Liu *et al.*, 2012).  
57 While the identity of Snn3 remains unknown, Tsn1 and Snn1 have been cloned and encode proteins  
58 similar to those involved in mediating resistance responses to biotrophic/hemibiotrophic plant  
59 pathogens. *Tsn1* encodes a nucleotide-binding oligomerisation domain-like receptor (NLR) with  
60 an N-terminal serine/threonine protein kinase domain (Faris *et al.*, 2010), and Snn1 is a member  
61 of the wall-associated kinase (WAK) family (Shi *et al.*, 2016). It is thought that *P. nodorum* has  
62 acquired the ability to hijack typical defence receptors and downstream pathways involved in  
63 resistance against biotrophic/hemibiotrophic pathogens to support its lifestyle (Faris *et al.*, 2010;  
64 Shi *et al.*, 2016). Despite this similarity, the molecular mechanisms that lead to effector triggered  
65 susceptibility and the molecular functions of necrotrophic effectors are largely unknown.

66 To further our understanding, we seek to determine the function of SnTox3 in *P. nodorum*  
67 pathogenesis. *SnTox3* encodes a 230 amino acid (25.3 kDa) protein with the first 20 amino acids  
68 at the N-terminus constituting a signal peptide (Liu *et al.*, 2009). Initial isolation of SnTox3 from  
69 culture filtrates identified a ~18 kDa protein in which residues 21-72 could not be detected by  
70 tryptic digest mass spectrometry (Liu *et al.*, 2009). On this basis, it was hypothesised that SnTox3,  
71 contained a pro-domain that is processed during maturation of the protein prior to secretion.  
72 Mature SnTox3 contains six cysteine residues that form three disulfide bonds. At least one of these  
73 disulfide bonds is required for activity as dithiothreitol (DTT) treatment prevents SnTox3-induced  
74 necrosis in *Snn3*-containing wheat lines (Liu *et al.*, 2009; Zhang *et al.*, 2017). SnTox3 does not  
75 share sequence identity or conserved motifs with any known proteins, and as a result determining  
76 its biochemical function has been challenging. However, recent work has identified a direct  
77 interaction between SnTox3 and defence-related pathogenesis-related-1 (PR1) proteins from  
78 wheat, although the molecular mechanisms underpinning the interaction are yet to be elucidated  
79 (Breen *et al.*, 2016).

80 To gain insight into the function of SnTox3 we determined the three-dimensional structure using  
81 X-ray crystallography to a resolution of 1.35 Å, revealing a novel protein fold among fungal  
82 effectors. Consistent with previous reports, we confirm that SnTox3 is secreted from *P. nodorum*  
83 without the putative N-terminal pro-domain; however, our biochemical studies highlight the  
84 importance of this region in SnTox3 protein folding. We demonstrate that specific cleavage of the  
85 pro-domain can be achieved *in vitro* using Kex2 protease, and that the removal of the pro-domain  
86 dramatically increases SnTox3-induced necrosis in *Snn3*-containing wheat. Kex2 cleavage of pro-  
87 domains is not unique to SnTox3 and we demonstrate that Kex2 removes the pro-domain *in vitro*  
88 from SnToxA and several of Secreted in Xylem (SIX) effectors from *Fusarium oxysporum* f. sp.  
89 *lycopersici* (Fol). Using an *in-silico* approach, we predicted the prevalence of Kex2-processed pro-  
90 domain (K2PP) effector proteins, which reveals that a number of effectors from economically  
91 important fungal pathogens are putative K2PP effector proteins. Collectively, our findings have  
92 broad implications for biochemical and functional studies of many fungal effectors.

## 93 **Materials and Methods**

### 94 **Plant material and fungal and bacterial strains**

95 *Snn3*-containing wheat (*Triticum aestivum* genotype Corack) was grown in a controlled  
96 environment chamber with a 16 h day at 20°C and 8 h night at 12°C cycle, and light intensity of  
97 250  $\mu\text{M m}^{-2} \text{s}^{-1}$  with 85% relative humidity. *P. nodorum* SN15 was grown on V8-PDA plates and  
98 incubated at 22°C under 12 h light cycles for 14 days. Following this, mycelium was harvested and  
99 grown at 22°C in liquid Fries 3 medium for 3 days with a 12 h light cycle and constant shaking at  
100 140 RPM. For recombinant expression, SHuffle® T7 Express lysY competent *E. coli* (NEB,  
101 C3030J) were cultured at 30°C in Terrific Broth media with appropriate antibiotics for plasmid  
102 selection.

### 103 **Vector construction**

104 The five effectors used in this study, SnTox3 and SnToxA from *P. nodorum*, and SIX1, SIX4 and  
105 SIX6 from *Fusarium oxysporum* f. sp. *lycopersici*, including their putative pro-domains, were  
106 codon-optimised for expression in *E. coli* (SnTox3<sup>21-230</sup>, SnToxA<sup>17-178</sup>, FolSIX1<sup>22-284</sup>, FolSIX4<sup>18-</sup>  
107 <sup>242</sup> and FolSIX6<sup>17-225</sup>) and were introduced into either the pET His6 Sumo TEV LIC cloning vector  
108 (2S-T; Addgene #29711) or the modified, Golden Gate-compatible, pOPIN expression vector. For  
109 the pET His6 Sumo TEV LIC cloning vector, the resulting constructs contained an N-terminal  
110 6xHis-tag-small ubiquitin modifier (SUMO) fusion followed by a *Tobacco etch virus* (TEV)  
111 protease site, and for pOPIN vectors the final constructs contained either an N-terminal 6xHis-tag,  
112 6xHis-tag-SUMO or 6xHis-tag-protein GB1 domain (GB1) followed by a 3C protease cleavage  
113 site. For expression studies to determine the importance of pro-domains for effector folding, the  
114 effectors excluding their pro-domains (SnTox3<sup>73-230</sup>, SnToxA<sup>61-178</sup>, FolSIX1<sup>96-284</sup>, FolSIX4<sup>59-242</sup>,  
115 FolSIX6<sup>62-225</sup>) were cloned into the modified pOPIN expression vector to include a 6xHis-tag-  
116 GB1. The Golden Gate digestion/ligation reactions and cycling were carried out as described by  
117 (Iverson *et al.*, 2016). All primers and gBlocks were purchased from Integrated DNA  
118 Technologies. The integrity of all plasmids was confirmed using Sanger sequencing. For a full list  
119 of primers and constructs used in this study see Table S1 and S2.

### 120 **Heterologous expression in *E. coli*; protein production and purification**

121 The effectors SnTox3, SnToxA, FolsIX1, FolsIX4 and FolsIX6 were produced in *E. coli*  
122 SHuffle®. Bacterial cultures were grown in Terrific Broth media at 30°C with shaking at 225 RPM  
123 until OD<sub>600</sub> was 0.6-0.8. At this point, the temperature was lowered to 16°C and the cultures  
124 induced with isopropyl-1-thio-β-D-galactopyranoside (IPTG) to a final concentration of 500 μM  
125 and incubated for a further 16 h. Following centrifugation, cell pellets were resuspended in 50 mM  
126 HEPES pH 8.0, 300 mM NaCl, 10 % (v/v) glycerol, 1 mM PMSF and 1 μg/mL DNase. Cells were  
127 lysed using an Avestin Emulsifex C5 at ~500-1000 psi. Proteins were purified from the clarified  
128 lysate by immobilised metal affinity chromatography (IMAC) on a 5 mL Ni<sup>2+</sup> His-Trap crude FF  
129 column. Fractions containing the protein of interest, as determined by SDS-PAGE analysis, were  
130 incubated overnight at 4°C with 6xHis-human rhinovirus 3C protease or 6xHis-TEV protease  
131 (~50-100 μg) to cleave the N-terminal fusions. The protein of interest was separated from any  
132 uncleaved protein, the fusion tag, and protease by IMAC and purified further by size-exclusion  
133 chromatography using either a HiLoad 16/600 Superdex 75 PG column or HiLoad 26/600  
134 Superdex 75 PG column (GE Healthcare) equilibrated with 20 mM HEPES pH 7.5 and 150 mM  
135 NaCl. Proteins were concentrated using either a 3 kDa or 10 kDa molecular weight cut-off  
136 concentrator (MWCO) (Amicon) and snap-frozen in aliquots using liquid nitrogen prior to storage  
137 at -80°C for further use. For SnTox3 crystallisation experiments, an additional anion exchange  
138 (AIEX) step was performed prior to SEC by passing the protein over a 1 mL AIEX column (GE  
139 Healthcare). SnTox3 protein, following IMAC, was dialysed into a buffer containing 20 mM Tris  
140 pH 7 and 100 mM NaCl, prior to passing it over the AIEX column. Under the conditions tested,  
141 correctly folded SnTox3 did not bind, however misfolded SnTox3 and contaminants did.

#### 142 **Kex2 processing of recombinant fungal effector proteins**

143 Recombinant SnTox3<sup>73-230</sup>, SnToxA<sup>17-178</sup>, FolsIX1<sup>22-284</sup>, FolsIX4<sup>18-242</sup>, and FolsIX6<sup>17-225</sup> were  
144 cleaved, to remove their putative pro-domains, using recombinant *Saccharomyces cerevisiae* Kex2  
145 protease (Abcam ab96554) at a 1:200 ratio at room temperature for 48 h. The cleaved protein was  
146 purified further using a Superdex Increase 75 10/300 (GE Healthcare Life Sciences), pre-  
147 equilibrated with 20 mM Hepes pH 7.5 and 150 mM NaCl.

#### 148 **Crystallisation, diffraction data collection and crystal structure determination**

149 Initial screening to determine crystallisation conditions for both SnTox3<sup>21-230</sup> and SnTox3<sup>Kex2</sup>  
150 (Kex2-cleaved SnTox3<sup>21-230</sup>) was performed in 96-well plates (LabTech) at 20°C using the

151 hanging-drop vapour-diffusion method and commercially available sparse matrix screens. For  
152 screening, 200 nL drops, which consisted of 100 nL protein solution and 100 nL reservoir solution,  
153 were prepared on hanging-drop seals (TTP4150-5100), using a Mosquito robot (TTP LabTech,  
154 UK) and equilibrated against 100  $\mu$ L reservoir solution. The drops were monitored and imaged  
155 using the Rock Imager system (Formulatrix, USA) over a period of 21 days. Crystals with the best  
156 morphology for SnTox3<sup>21-230</sup> were observed in 20% w/v PEG 3350 and 0.2 M sodium acetate  
157 trihydrate pH 4.5 (ShotGun A3), and 0.1 M HEPES pH 7.5 and 20% w/v PEG 10000 (ShotGun  
158 A6). For SnTox3<sup>Kex2</sup>, crystals grew in 0.2 M magnesium chloride hexahydrate, 0.1 M Tris pH 8.0  
159 and 20% w/v PEG 6000 (PACT D10), and 0.2 M sodium nitrate, 0.1 M Bis-Tris propane pH 6.5  
160 and 20% w/v PEG3350 (PACT F5). Crystal optimisation was carried out in 24-well hanging-drop  
161 vapour diffusion plate format and involved altering both pH and precipitant concentrations. The  
162 final optimised crystallisation conditions for SnTox3<sup>Kex2</sup> were 0.2 M sodium nitrate, 0.1 M Bis-  
163 Tris propane pH 6.5, 18% w/v PEG3350 and 0.2 M magnesium chloride hexahydrate, 0.1 M Tris  
164 pH 7.6 and 18-20% w/v PEG 6000.

165 Before x-ray data collection, crystals were transferred into a cryoprotectant solution containing the  
166 reservoir solution with 20% glycerol. SnTox3<sup>Kex2</sup> crystals were soaked for ~60 s in reservoir  
167 solution supplemented with 1 M sodium bromide. Datasets of native and bromide-soaked crystals  
168 were collected on the MX2 beamline at the Australian Synchrotron (Table S3). The datasets were  
169 processed in XDS (Kabsch, 2010) and scaled using Aimless (Kabsch, 2010; Evans & Murshudov,  
170 2013) in the CCP4 suite (Winn *et al.*, 2011). For bromide-based SAD phasing, the CRANK2  
171 pipeline was used (Skubák & Pannu, 2013) in the CCP4 suite. The model was then refined using  
172 phenix.refine in the PHENIX package (Afonine *et al.*, 2012), and iterative model building between  
173 refinement rounds was carried out in Coot (Emsley *et al.*, 2010). This model was then used as a  
174 template for molecular replacement, using a native SnTox3<sup>Kex2</sup> dataset. Automatic model building  
175 was carried out with AutoBuild (Terwilliger *et al.*, 2008), and the resulting model was refined  
176 using phenix.refine in the PHENIX package (Adams *et al.*, 2010), and iterative model building  
177 between refinement rounds was carried out in Coot (Emsley *et al.*, 2010). Structure validation was  
178 carried out using the MolProbity online server (Davis *et al.*, 2004). A structural similarity search  
179 was carried out using the Dali server (Holm & Rosenstrom, 2010).

180 **Mass spectrometry (MS) of intact protein and N-terminal sequencing to identify point of**  
181 **cleavage in SnTox3<sup>21-230</sup> crystals**

182 MS was carried out using intact SnTox3<sup>21-230</sup> protein both prior to and after crystallisation, to  
183 determine the size of the cleaved protein. The dissolved crystals were buffer-exchanged using a  
184 10 kDa MWCO concentrator (Amicon) to remove the PEG 6000 present in the crystallisation  
185 buffer. The samples were then run on an Orbitrap Elite™ (Thermo) mass spectrometer and Dionex  
186 UltiMate™ 3000 nano LC system (Thermo). Each sample was first desalted on a PepMap™ 300  
187 C4 pre-column using buffer A (30 µL/min) for 5 min and separated on an Acclaim PepMap 300  
188 (75 µm x 150 mm) at a flow rate of 300 nL/min. A gradient of 10-90% buffer B over 5 minutes  
189 was used, where buffer A was 0.1% formic acid (FA) in water and buffer B was 80% acetonitrile/  
190 0.1% FA. The eluted protein was directly analysed on an Orbitrap Elite™ mass spectrometer  
191 interfaced with a NanoFlex source. MS was operated in positive ion mode using the Orbitrap  
192 analyser set at 60,000 resolution. Source parameters included an ion spray voltage of 2 kV,  
193 temperature at 275°C, SID = 30 V, S-lens = 70 V, summed microscans = 10 and FT vacuum = 0.1.  
194 MS analysis was performed across 600-2000 m/z. The data was deconvoluted using Thermo  
195 Protein Deconvolution™ software across m/z 600-2000, S/N=1, and minimum number of charges  
196 set to 3. Deconvoluted data are reported as uncharged monoisotopic masses.

197 N-terminal sequencing was carried out by the Australian Proteome Analysis Facility (APAF).  
198 Approximately 10 µg of SnTox3<sup>21-230</sup>, in a solution containing 10 mM HEPES pH 7.0, 150 mM  
199 NaCl, 0.1 M bicine pH 8.0 and 12% PEG 6000, was dissolved in 100 µL of 0.1% trifluoroacetic  
200 acid (TFA) and 50 µL of this solution desalted on a ProSorb PVDF filter cartridge (Life  
201 Technologies) with three 0.1 % TFA washes. The sample on the PVDF membrane was subjected  
202 to 7 residue cycles of Edman N-terminal sequencing using an Applied Biosystems Procise® 494  
203 protein sequencing system.

#### 204 **Wheat protein-mediated phenotyping assay**

205 SnTox3<sup>21-230</sup> and SnTox3<sup>Kex2</sup>, at concentrations of 0.1 µM, 0.5 µM, and 1 µM, were  
206 syringe-infiltrated into the second leaf of two-week old Corack plants (*Snn3*-containing). Kex2 at  
207 a concentration consistent with the highest concentration used for cleavage was used as a control.  
208 After 3 days, the leaves were harvested and imaged.

#### 209 **Western blot analysis of SnTox3 from culture filtrates**

210 For western blot analysis rabbit polyclonal SnTox3 antibodies were generated against recombinant  
211 SnTox3<sup>21-230</sup> protein at the Walter & Eliza Hall Institute of Medical Research (WEHI). Culture



212 filtrates of *P. nodorum* SN15 and a SnTox3KO strain (Liu *et al.*, 2009) were centrifuged at 5000  
213 x g for 15 min at 4°C and resolved by SDS-PAGE prior to transfer to a PVDF membrane (BioRad,  
214 Hercules, CA, USA). The membrane was then incubated with SnTox3 primary antibodies, which  
215 were detected by anti-rabbit IgG HRP from goat (Sigma-Aldrich). Immunolabelled protein bands  
216 were detected on the immunoblot using ECL substrate (BioRad) and visualised by  
217 ImageQuant4000 (GE Healthcare).

### 218 **Protein lipid overlay assay**

219 Commercial membrane strips, spotted with 100 pmol of various biologically important lipids  
220 found in cell membranes (Membrane Lipid Strips, Echelon Biosciences) were used to detect if  
221 SnTox3<sup>Kex2</sup> could bind lipids. SnTox3<sup>Kex2</sup> was spotted onto the membrane to act as a positive  
222 control for antibody detection. Once dried, the membrane was blocked with PBS-T + 1% skim  
223 milk powder (blocking buffer). All steps were carried out with agitation at room temperature for 1  
224 h. Then 0.5 µg/mL SnTox3<sup>Kex2</sup> in blocking buffer was incubated for 1 h, followed by three wash  
225 steps using PBS-T for 10 min each. Anti-SnTox3 antibody in blocking buffer (1:1000 dilution)  
226 was added and incubated for 1 h, followed by three wash steps as described previously. The bound  
227 antibody was detected with an anti-rabbit IgG HRP from goat (1:2000 dilution) in 10 mL of PBS-  
228 T, followed by a wash step, as described. Protein binding was detected by using ECL substrate  
229 (BioRad) and visualised by ImageQuant4000 (GE Healthcare, Silverwater, TX, USA).

### 230 **Bioinformatics search for effectors with Kex2-processed pro-domains**

231 A python script was used to search for the occurrence of Kex2-processed pro-domains (K2PP)  
232 in secreted fungal effectors  
233 ([https://github.com/JanaSperschneider/Publications\\_Code/tree/master/2020\\_04\\_Tox3\\_LxxR\\_Pa](https://github.com/JanaSperschneider/Publications_Code/tree/master/2020_04_Tox3_LxxR_Paper)  
234 [per](https://github.com/JanaSperschneider/Publications_Code/tree/master/2020_04_Tox3_LxxR_Paper)). First, SignalP 3.0 (Bendtsen *et al.*, 2004) was run to determine the predicted signal peptide  
235 cleavage site. We then searched for occurrences of LxxR, KR or RR motifs in the predicted  
236 secreted protein. For all motif positions, we analysed the N-terminal sequence before the motif  
237 (excluding the predicted signal peptide) and the C-terminal sequence after the motif. If the  
238 N-terminal sequence was longer than four amino acids and the C-terminal sequence occupied more  
239 than half of the mature secreted protein, it was analysed further. We analysed the percentages of  
240 amino acids that are associated with disorder (K, E, N, S, P, G, R, D, Q, M) and those that are  
241 associated with order (W, Y, F, I, C, L, V, H) (Weathers *et al.*, 2004) in the N-terminal sequence

242 and in the C-terminal sequence. If at least two-thirds of amino acids (aas) in the N-terminal  
243 sequence are disorder-promoting (disorder-promoting aas/(disorder-promoting aas + order-  
244 promoting aas)) and if the proportion of disorder-promoting amino acids in the N-terminal  
245 sequences is higher than in the C-terminal sequence, the secreted protein was labelled as having a  
246 predicted disordered region with a Kex2 protease cleavage site. The list of fungal effectors were  
247 taken from the EffectorP 2.0 publication (Sperschneider *et al.*, 2018).

#### 248 **Agro-infiltration of SnTox3 in *Nicotiana benthamiana***

249 The SnTox3-SP:GFP construct was generated by recombining pDONR201-PR1ΔSPSnTox3  
250 (Breen *et al.*, 2016) into the plant expression vector pB7FWG2.0 using a Gateway LR reaction.  
251 The pB7WGF2.0\_empty vector (EV:GFP) was used as a negative control. After sequence  
252 confirmation, the constructs were expressed in *Nicotiana benthamiana* using agro-infiltration, as  
253 described previously.

254

## 255 **Results**

### 256 **The effector SnTox3 is synthesised as a pre-pro-protein**

257 Previously, we reported a protocol for producing several functionally active fungal effectors,  
258 including SnTox3<sup>21-230</sup> (pro-domain containing) using the *E. coli* strain SHuffle® (Zhang *et al.*,  
259 2017). However, the overall yields for SnTox3 were low and not amenable for structural studies.  
260 To address this problem, we tested the ability of two N-terminal cleavable fusion partners, small  
261 ubiquitin-like modifier (SUMO) and protein GB1 domain (GB1), to enhance solubility and  
262 improve SnTox3 yields compared to a 6xHis tag alone. The addition of both 6xHis-SUMO and  
263 6xHis-GB1 improved overall yields, with comparable purity, and the GB1 fusion resulted in the  
264 highest yields (Fig. S1, Table S4). The improvements made to SnTox3 protein production enabled  
265 us to proceed with crystallisation studies and thin, needle-like crystals were obtained for SnTox3  
266 (data not shown). However, these crystals diffracted poorly (>9 Å resolution), despite extensive  
267 optimisation, preventing structure determination.

268 We suspected additional processing of SnTox3 may be influencing crystal formation and quality.  
269 SDS-PAGE analysis of the protein from the crystallisation drops revealed that the majority of  
270 SnTox3 was ~6 kDa smaller than expected (Fig. 1a), suggesting that proteolytic cleavage was  
271 occurring post purification. Characterisation of the protein in the crystallisation drop using intact  
272 MS identified a species with a monoisotopic mass of ~18 kDa (Fig. S2). Further analysis using N-  
273 terminal sequencing demonstrated that this ~18 kDa protein began at residue Tyrosine 73 (Fig.  
274 1b), which corresponds to the sequence immediately after the putative Kex2 protease recognition  
275 site identified previously by Liu *et al.* (2009).

276 We subsequently sought to determine what form of SnTox3 is produced by the fungus. Antibodies,  
277 generated against purified SnTox3 protein, were used in western blot analysis of culture filtrates  
278 of *P. nodorum* isolate SN15 and a SnTox3 knockout variant (Fig. 1c). This analysis demonstrated  
279 that the secreted form of SnTox3 corresponds to an 18 kDa protein, indicating that the pro-domain  
280 is removed to produce the mature protein found in the culture filtrate, which is consistent with  
281 removal of the signal peptide and pro-domain prior to secretion.

### 282 **The SnTox3 pro-domain is necessary for SnTox3 heterologous production but reduces** 283 **necrosis-inducing activity**

284 In light of these findings, we sought to produce recombinant SnTox3 without the pro-domain  
285 (SnTox3<sup>73-230</sup>). Strikingly, we observed a substantial reduction (~10X less) in the amount of  
286 soluble SnTox3<sup>73-230</sup> compared to SnTox3 with the pro-domain (SnTox3<sup>21-230</sup>), regardless of the  
287 use of a GB1 fusion (Fig. S3a). These data suggest that the pro-domain is essential for the  
288 production of correctly folded SnTox3 in *E. coli*. To overcome this obstacle, we pursued removal  
289 of the pro-domain using Kex2 to mimic the natural processing and maturation of SnTox3. Kex2 is  
290 an important endogenous protease conserved across fungi (Wickner, 1974; Newport & Agabian,  
291 1997; Bader *et al.*, 2008; Jacob-Wilk *et al.*, 2009), which cleaves pro-proteins in a site-specific  
292 manner. The cleavage motif for Kex2 is typically described as a dibasic motif, with a preference  
293 for Arg at position P1 (where the order is P4-P3-P2-P1-cleavage) and a basic residue (typically  
294 Lys or Arg) at position P2 (Bevan *et al.*, 1998; Bader *et al.*, 2008). Additional *in vivo*  
295 characterisation of this cleavage motif in *S. cerevisiae* has suggested that specificity also occurs at  
296 P4, with a particular preference for Leu or other aliphatic residues (Rockwell & Fuller, 1998; Li  
297 *et al.*, 2017). In SnTox3, a LSKR motif is localised at the pro-domain/mature protein junction (Fig.  
298 1c, Table S4). To test if Kex2 can remove the pro-domain from SnTox3, we incubated Kex2  
299 protease with purified SnTox3<sup>21-230</sup> and demonstrated the selective removal of the N-terminal pro-  
300 domain (Fig. 2a), further implicating the role of Kex2 in effector maturation. We subsequently  
301 defined SnTox3 as a Kex2-processed pro-domain (K2PP) effector.

302 To understand the effect on the necrosis-inducing activity of SnTox3 following pro-domain  
303 removal, we infiltrated recombinant SnTox3<sup>21-230</sup> and SnTox3<sup>Kex2</sup> (pro-domain removed with  
304 Kex2), at concentrations of 0.1, 0.5, and 1 µM, into the 2<sup>nd</sup> leaf of 2-week-old Corack (*Snn3*-  
305 containing) seedlings (Fig. 2b). After 3 days, the leaves infiltrated with SnTox3<sup>Kex2</sup> showed more  
306 advanced and severe signs of necrosis across the tested concentrations when compared to full-  
307 length SnTox3 (Fig. 2b). Importantly, Kex2 alone did not induce cell death (Fig. S4). These data  
308 demonstrate that inclusion of the pro-domain has an inhibitory effect on the necrosis-causing  
309 activity of SnTox3, which likely explains why this region is removed during maturation and  
310 secretion of the protein.

### 311 **The crystal structure of SnTox3 reveals a β-barrel fold**

312 With the role of the pro-domain defined for SnTox3, we decided to use SnTox3<sup>Kex2</sup> for  
313 crystallisation. This approach was successful and enabled us to determine the crystal structure of

314 SnTox3<sup>Kex2</sup> to a resolution of 1.35 Å, using a bromide ion-based single-wavelength anomalous  
315 diffraction (SAD) approach (Fig. 3a, Table S3). Overall, mature SnTox3 contains ten β-strands  
316 (β1-β10), where eight of the β-strands are connected in an antiparallel up-and-down topology by  
317 loops of various lengths and result in a β-barrel, linked together by three disulfide bonds. The only  
318 region not bound by disulfide bonds back to the barrel includes the β-strands β3 and β4,  
319 encompassing residues 113 to 137, which adopt a β-hairpin-like structure (Fig. 3a). Interpretable  
320 electron density for three disulfide bonds was observed and shows that they all localise to one end  
321 of the protein (Fig. 3a, 3b). The positioning of the disulfide bonds, within the context of the fold,  
322 suggests that these bonds play a role in providing overall stability to the structure, and to  
323 specifically anchor the β-strands together. The connectivity of the disulfide bonds differs from that  
324 originally predicted for SnTox3 (Liu *et al.*, 2009); disulfide bonds are formed by the pairs C89-  
325 C218, C154-C209, and C166-C203, form disulfide bonds (Fig. 3a, 3b).

### 326 **SnTox3 structure is novel among fungal effectors but shares structural similarity with** 327 **bacterial pore-forming toxins (PFTs)**

328 To identify whether SnTox3 was structurally similar to other proteins, the structure was compared  
329 against all reported structures in the Protein Data Bank utilising the Dali server (Holm &  
330 Rosenstrom, 2010). SnTox3 shares only low structural similarities with proteins of known  
331 structure and no structural similarity to other fungal effectors (Fig. S5). The most similar structures  
332 to SnTox3 are the family of bacterial pore-forming toxins (PFTs), originating from various  
333 pathogenic bacterial species (Fig. S5). In particular, SnTox3 shares similarity to β-PFTs, which  
334 form a β-barrel structure that inserts into lipid bilayer to form the pore. The closest structural match  
335 was the bi-component toxin LukGH (leukocidin) from *Staphylococcus aureus*. Structure  
336 superposition (Fig. 3c) of SnTox3 and LukGH reveals a root-mean-square deviation (RMSD) of  
337 3.7 Å for 107 structurally equivalent Cα atoms, despite sharing <10% protein sequence identity  
338 (Fig. S5). The structural similarity between LukGH and SnTox3 is confined to the cap domain of  
339 LukGH only, which is the extracellular domain that interacts with adjacent protomers in the pore  
340 complex (Menestrina *et al.*, 2003; Parker & Feil, 2005; Badarau *et al.*, 2015) (Fig. 3c). There are  
341 also noticeable differences between SnTox3 and the cap domains. Cap domains in PFTs adopt an  
342 overall β-sandwich fold consisting of two, generally six-stranded, antiparallel β-sheets (Menestrina  
343 *et al.*, 2003; Parker & Feil, 2005; Badarau *et al.*, 2015), whereas SnTox3 contains ten β-strands  
344 that form a β-barrel. In light of the structural differences and the lack of the rim and stem domain,

345 SnTox3 alone would be unable to form a membrane-spanning pore analogous to PFTs. Despite  
346 these differences, we tested whether SnTox3 would associate with lipids using a simple lipid  
347 overlay assay, as reported for several bacterial PFTs (Savva *et al.*, 2013; Gil *et al.*, 2015). No  
348 binding of SnTox3<sup>Kex2</sup> was observed to any of the membrane lipids tested (Fig. 3d).

### 349 **Predicted Kex2-processed pro-domains are common in fungal effectors**

350 Several reports have implicated Kex2 in the processing of N-terminal regions from other fungal  
351 effectors (Jia *et al.*, 2000; Basse *et al.*, 2002; Rep, 2005; Houterman *et al.*, 2007; Simbaqueba *et*  
352 *al.*, 2018). We wished to determine if our approach for protein production of SnTox3 was more  
353 broadly applicable to other cysteine-rich fungal effectors. Four effectors, including SIX1, SIX4  
354 and SIX6 from *Fusarium oxysporum* f. sp. *lycopersici* (Fol) and SnToxA were used for further  
355 experimentation (Table S4). Previously, FolSIX1 and FolSIX4 were suggested to be synthesised  
356 as pre-pro-proteins following identification of a putative Kex2-processing site (Rep, 2005;  
357 Houterman *et al.*, 2007), and SnToxA is thought to be synthesised as a pre-pro-protein (Ballance  
358 *et al.*, 1989; Ciuffetti *et al.*, 1997), although Kex2 was never implicated in SnToxA processing.  
359 We produced these effectors using *E. coli* SHuffle, and found that the use of an N-terminal GB1  
360 fusion improved soluble protein yields in all cases, consistent with our data for SnTox3 (Fig. S6-  
361 S9, Table S4). We also found that the putative pro-domain was required to produce all effector  
362 proteins in a soluble form using the *E. coli* expression system (Fig. S3). We subsequently  
363 demonstrated that Kex2 could remove the N-terminal putative pro-domain of all four effectors  
364 (Fig. 4a). For FolSIX4 and FolSIX1, some additional processing was observed after Kex2  
365 treatment, which is consistent with the presence of multiple putative Kex2 motifs (Lys-Arg and  
366 Arg-Arg) within these protein sequences (Table S5). Collectively, these data are consistent with  
367 these proteins representing K2PP effectors and suggest that the pro-domains are essential for  
368 producing correctly folded proteins.

369 Based on our *in vitro* studies, we investigated the prevalence of K2PPs in fungal effectors using  
370 an *in-silico* approach. We analysed the sequences of FolSIX1, FolSIX4, FolSIX6, SnTox3 and  
371 SnToxA to uncover common features. We identified a conserved Leu at P4, and Arg at P1 with  
372 varied residues at P3 and P2 (LxxR) at the junction of the putative pro-domains and mature  
373 domain. This is consistent with a recent study from yeast that defined a major cleavage pattern for  
374 Kex2 protease as being an aliphatic (preferentially a Leu) at P4 and either a Lys or Arg at P2,

375 followed by an Arg at P1 (Li *et al.*, 2017). In addition, pro-domains in the experimentally defined  
376 effectors are predicted to be predominantly disordered. As a result, we searched for the presence  
377 of LxxR, and the canonical Kex2 dibasic (KR and RR) motifs in 120 fungal effectors taken from  
378 Sperschneider *et al.* (2018). Given the prevalence of these motifs in the effector protein sequences  
379 we further constrained our search to within the first half of the amino acid sequence (following  
380 signal peptide removal) and included a criterion whereby the motif needed to be preceded by a  
381 high proportion of disorder-promoting amino acids. Of these effectors, 33 (27.5%) are predicted  
382 to have K2PPs (Fig. 4b), including all effectors previously implicated as being Kex2 cleaved in  
383 the literature, except Avr-Pita (Jia *et al.*, 2000; Rep, 2005). In several effectors multiple putative  
384 Kex2 motifs were identified to be present (Fig. 4b, Table S5) and in some instances the presence  
385 of a potential Kex2 motifs in the mature domain of the protein was observed (see Table S5).

## 386 Discussion

387 To date, several structures of effector proteins originating from fungal plant pathogens have been  
388 determined, and have provided insights into the biochemical functions of these proteins as well as  
389 how they are recognised by the plant (Sarma *et al.*, 2005; Guncar *et al.*, 2007; Wang *et al.*, 2007;  
390 Sánchez-Vallet *et al.*, 2013; Ve *et al.*, 2013; Nyarko *et al.*, 2014; de Guillen *et al.*, 2015; Maqbool  
391 *et al.*, 2015; Ose *et al.*, 2015; Liu *et al.*, 2016; Di *et al.*, 2017; De la Concepcion *et al.*, 2018;  
392 Hurlburt *et al.*, 2018; Zhang *et al.*, 2018). An emerging insight from these structures is the  
393 existence of conserved folds despite originating from fungi that belong to different taxa and having  
394 high levels of sequence diversity (reviewed by (Franceschetti *et al.*, 2017)). An example is the  
395 MAX (*Magnaporthe* AvrS and ToxB-like) effector family, which includes representatives from  
396 the rice blast pathogen *M. oryzae* (Zhang *et al.*, 2013; de Guillen *et al.*, 2015; Maqbool *et al.*, 2015;  
397 Ose *et al.*, 2015) and the wheat pathogen *Pyrenophora tritici-repentis* (Nyarko *et al.*, 2014). Here,  
398 we report the first effector structure from *P. nodorum* and show that the  $\beta$ -barrel fold of SnTox3  
399 is novel among fungal effectors, perhaps suggestive of a new structural family. In general,  $\beta$ -barrel  
400 folds are known to be associated with high stability and robustness against temperature and pH  
401 changes (Koebnik *et al.*, 2000; Tamm *et al.*, 2004). SnTox3 is proposed to function in the apoplast  
402 (Liu *et al.*, 2009) and its structure likely plays an important role in maintaining protein stability  
403 within this environment. Protein stability is also enhanced by the formation of three disulfide  
404 bonds, which link the  $\beta$ -strands together, and in light of the structure, it is not surprising that

405 reduction of these bonds via DTT treatment leads to the abolition of SnTox3-induced cell death  
406 (Liu *et al.*, 2009).

407 Our structural similarity searches revealed that SnTox3 shares the highest structural similarity with  
408 the cap domains of bacterial pore-forming toxins (PFTs), despite sharing no identifiable similarity  
409 at the protein sequence level. While intriguing, particularly given commonalities in cytotoxic  
410 function and pathogen virulence, the lack of important additional domains in SnTox3 demonstrate  
411 that the protein alone is unlikely to perforate membranes. At this stage, the structure of SnTox3  
412 has not enabled us to directly infer function. This has been the case with most fungal effector  
413 structures published to date (Sarma *et al.*, 2005; Wang *et al.*, 2007; Ve *et al.*, 2013; Nyarko *et al.*,  
414 2014; Blondeau *et al.*, 2015; de Guillen *et al.*, 2015; Maqbool *et al.*, 2015), where additional  
415 protein-protein interaction screening and biochemical experiments have been needed to derive  
416 function.

417 Here, we show experimentally that SnTox3 contains a Kex2-processed pro-domain. Kex2 is a  
418 highly-conserved serine protease that localises to the late trans-Golgi network (Redding *et al.*,  
419 1991) and a pre-vacuolar compartment in fungi (Blanchette *et al.*, 2004). Kex2 is responsible for  
420 the maturation of proteins in a site-specific manner and plays a pivotal role in protein secretion in  
421 yeast and fungi. Recently, the prevalence of Kex2-processed repeat proteins in nearly all fungi,  
422 including human and plant pathogens, was shown using a genome-wide survey of 250 publicly  
423 available fungal secretomes (Le Marquer *et al.*, 2019). Some of the identified peptides  
424 corresponded to sexual pheromones, mycotoxins as well as effector proteins, and many of the  
425 putative-processed protein had unknown functions (Le Marquer *et al.*, 2019). While Kex2  
426 processing is not a defining feature of fungal effectors, a role for the protease has been implicated  
427 in pathogen virulence. Several Kex2 deletion mutants have been studied in human pathogens,  
428 including *Candida albicans*, *Aspergillus niger*, and *Cryphonectria parasitica* (Newport &  
429 Agabian, 1997; Newport *et al.*, 2003; Punt *et al.*, 2003; Jacob-Wilk *et al.*, 2009). Collectively in  
430 these mutants, reduced virulence was observed but they also suffered from other pleiotropic effects  
431 and morphological changes, highlighting the general role that Kex2 plays in fungal growth and  
432 development.

433 In fungal effectors, Kex2 cleavage of repeat-containing effectors, such as Rep1, Hum3, and Rsp1  
434 from *Ustilago maydis*, is known to play a role in pathogen infection and virulence (Wösten *et al.*,



435 1996; Müller *et al.*, 2008; Mesarich *et al.*, 2015; Ma *et al.*, 2018). Despite this, to the best of our  
436 knowledge, Kex2 processing to remove the N-terminal pro-domain of a fungal effector has not  
437 been demonstrated experimentally prior to this report. The current literature infers the role of Kex2  
438 by highlighting the absence of the N-terminal pro-domain region in the mature form of the protein  
439 based on mass spectrometry experiments and the association with ‘canonical’ dibasic Kex2  
440 recognition sites (Ballance *et al.*, 1989; Ciuffetti *et al.*, 1997; Jia *et al.*, 2000; Basse *et al.*, 2002;  
441 Rep, 2005; Houterman *et al.*, 2007; Simbaqueba *et al.*, 2018). Based on our data, we suggest that  
442 K2PP effectors are highly prevalent in fungal effectors and this has broad implications in fungal  
443 effector biology.

444 Pro-domains are found in a diverse range of proteins, and are best known for their roles in  
445 controlling activity in proteases and hormones. They have also been implicated in stabilisation and  
446 correct folding of these proteins (Baker *et al.*, 1993; Zanin *et al.*, 2017). We found that inclusion  
447 of the pro-domain is crucial for producing soluble cysteine-rich effector proteins in *E. coli*. This  
448 agrees with early studies involving PtrToxA, whereby the pro-domain was required for protein  
449 refolding when produced as an insoluble protein in *E. coli* (Tuori *et al.*, 2000). A number of studies  
450 involving effectors from our K2PP effector list (Fig. **4b**) have reported consequences when  
451 manipulating the putative pro-domain. For example, deletion of residues 24-60 in the *U. maydis*  
452 effector Rsp3 prevented effector secretion and led to protein accumulation within fungal cells (Ma  
453 *et al.*, 2018). Similarly, removal of the putative pro-domain from the *Zymoseptoria tritici* effector  
454 Zt6 led to loss of protein function. It was suggested that this region was involved in protein re-  
455 entry into host cells (Kettles *et al.*, 2018); however, it remains plausible that inappropriate  
456 trafficking or protein misfolding caused loss of activity. Collectively, the available data suggest  
457 that pro-domains are involved in protein folding and trafficking of K2PP effectors, but clearly  
458 further experimentation is required.

459 The removal of the pro-domain (post-folding) was pivotal for obtaining high quality crystals of  
460 SnTox3. We also observed that the activity of SnTox3 was hindered if the pro-domain remained  
461 intact (Fig. **2b**). This brings to light important considerations for studying K2PP fungal effectors.  
462 Kex2 is specific to fungi, and is not present in plants. K2PP effectors are often studied and  
463 produced *in-planta* via transient or stable expression without taking account of their Kex2  
464 processing requirements. We found that in *Nicotiana benthamiana*, the pro-domain of SnTox3 is  
465 not cleaved during secretion, demonstrating that the protein is not matured *in planta* in the same

466 way as it is within the fungus (Fig. **S10**, Fig. **1c**). Another consideration that should be made is  
467 immune-reactive tag positioning (N or C-terminus) and how this could be impacted by the  
468 processing of the pro-domain, particularly in fungal expression systems or if Kex2 is utilised *in*  
469 *vitro* for effector maturation. These examples represent but a few crucial considerations when  
470 studying K2PP effectors.

## 471 **Conclusions**

472 Studies aiming to understand the molecular mechanisms of how plant pathogen effectors modulate  
473 host physiology and defence pathways is a major focus in the field of plant-microbe interactions.  
474 Here, we report the crystal structure of SnTox3, which has a novel fold among fungal effectors.  
475 SnTox3 is a Kex2-processed pro-domain (K2PP) effector, and we demonstrate that K2PPs are  
476 present in significant proportion of fungal effectors. Our work with SnTox3 and other pro-domain  
477 containing effectors provides a template for the production and study of K2PP effectors in general,  
478 which has broad implications for other researchers characterising fungal effectors using both *in*  
479 *vitro* and *in vivo* methods.

## 480 **Acknowledgements**

481 This work was supported by the Australian Research Council (ARC; DP160102244 and  
482 DP190102526 to B.K., and DP120103558 and DP180102355 P.S.). S.W. was funded by an ARC  
483 DECRA (DE160100893) and is supported by the ANU Future Scheme (35665). B.K. was an  
484 NHMRC Principal Research Fellow (1110971) and is an ARC Laureate Fellow (FL180100109).  
485 P.S. was an ARC Future Fellow (FT110100698). J.S. is funded by an ARC DECRA  
486 (DE190100066). M.O. was a recipient of the Australian Government Research Training Program  
487 (RTP) Stipend Scholarship. D.Y. was a recipient of the AINSE Honours Scholarship Program.  
488 S.R. was a recipient of an Australian Government Research Training Program International Fee  
489 Offset Scholarship. We thank Mark Youles in the TSL Synbio team, Adam Bentham, and Mark  
490 Banfield for providing the pOPIN golden gate vectors. The MS analysis was carried out at the  
491 Mass Spectrometry Facility in the School of Chemistry and Molecular Biosciences, University of  
492 Queensland and we thank Peter Josh and Amanda Nouwens for their technical assistance. We  
493 acknowledge the use of the University of Queensland Remote Operation Crystallization and X-ray  
494 (UQ ROCX) facility at the Centre for Microscopy and Microanalysis and the support from staff,  
495 Gordon King and Karl Byriel. We also acknowledge use of the Australian Synchrotron MX facility  
496 and thank the staff for their support. Aspects of this research have been facilitated by access to the  
497 Australian Proteome Analysis Facility supported under the Australian Government's National  
498 Collaborative Research Infrastructure Strategy (NCRIS). The co-ordinates and structure factors  
499 for SnTox3 have been deposited in the PDB with accession number 6WES.

## 500 **Author contributions**

501 M.O., D.J., P.S., B.K., and S.W. designed the study; M.O., Y.S., D.Y., B.D., S.R., D.E., J.S and  
502 S.W. performed the experiments; all authors analysed the data. M.O. and S.W. wrote the original  
503 draft and all authors contributed to writing, reviewing and editing of the manuscript.

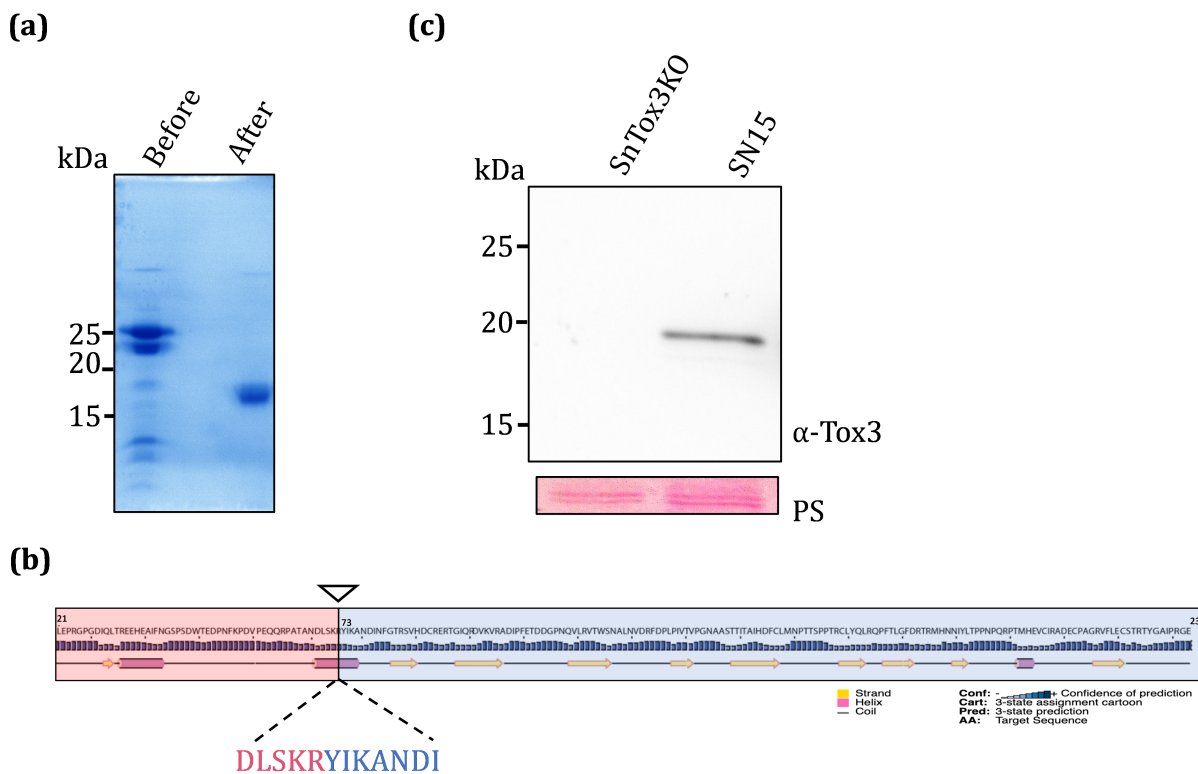

504

505

506 **Figure 1: SnTox3 is secreted as a pre-pro-protein from *P. nodorum*.** (a) Coomassie-stained  
507 SDS-PAGE gel showing recombinant SnTox3<sup>21-230</sup> prior to crystallisation and after crystal  
508 formation shows a difference in size of ~5-10 kDa. (b) Schematic diagram of SnTox3<sup>21-230</sup>,  
509 highlighting secondary structure predictions as determined by PSIPRED (Jones, 1999; Buchan &  
510 Jones, 2019) with confidence levels shown as a bar graph. The putative pro-domain (residues 21-  
511 72; 5.9 kDa) is shown in red, and the mature domain (73-230; 17.9 kDa) is shown in blue. The  
512 black arrow indicates the putative Kex2 cleavage site, and the first five residues detected by N-  
513 terminal sequencing of the protein from the crystallisation drop are enlarged and underlined in  
514 black. (c) Top panel: culture filtrates of *P. nodorum* SN15 and SnTox3KO strains were analysed  
515 by western blot and probed with SnTox3 primary antibodies, which were detected by goat anti-  
516 rabbit IgG HRP. Bottom panel: Ponceau staining (PS) to show protein loading. Numbers on the  
517 left of gel images indicate sizes of molecular weight markers.

518

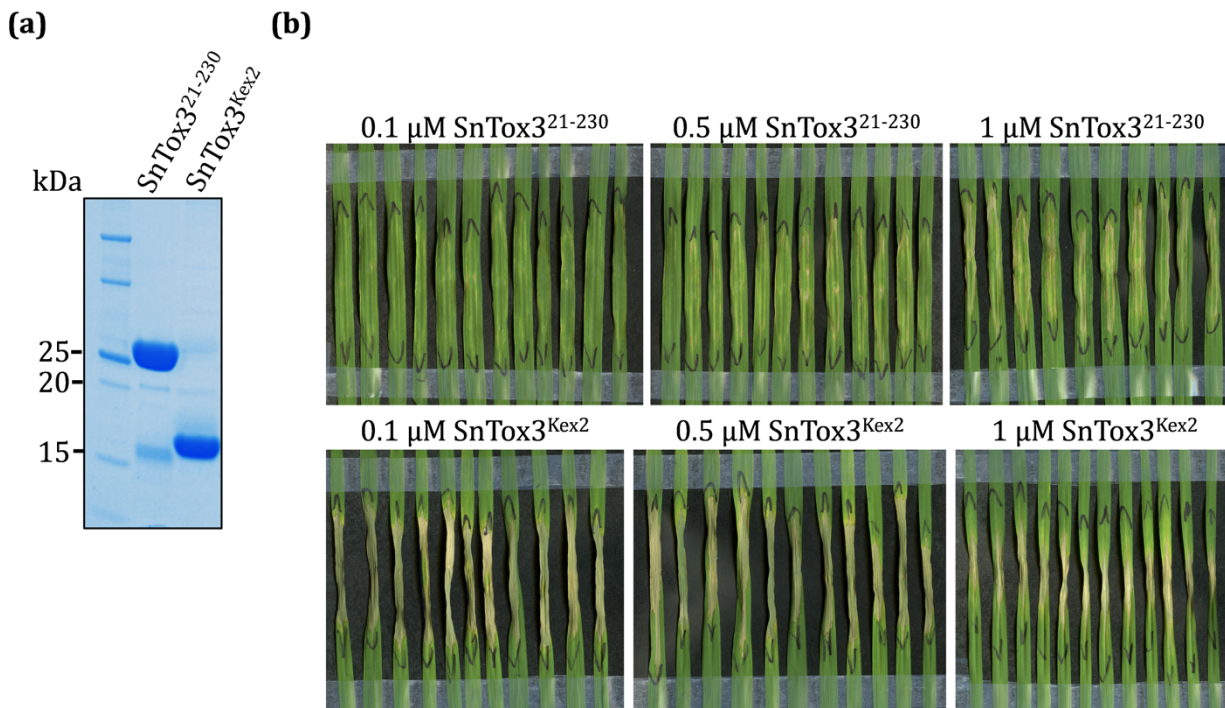

519

520 **Figure 2: Removal of the pro-domain from recombinant SnTox3 increases necrosis-causing**  
521 **activity. (a)** Coomassie-stained SDS-PAGE gel showing *in vitro* Kex2-mediated cleavage of  
522 SnTox3<sup>21-230</sup> using a 1/200 dilution (of SnTox3<sup>21-230</sup>: Kex2 (Abcam ab96554)). The first lane  
523 shows molecular weight markers, with sizes indicated by numbers on the left-hand side. Lane 2  
524 contains recombinant SnTox3<sup>21-230</sup> and lane 3 is SnTox3<sup>21-230</sup> following cleavage by Kex2  
525 (Tox3<sup>Kex2</sup>). **(b)** Necrosis caused by 0.1, 0.5 and 1 μM SnTox3<sup>21-230</sup> (top panel) or SnTox3<sup>Kex2</sup>  
526 (bottom panel) following infiltration into the second leaf of Corack (*Snn3*-containing) wheat  
527 leaves. The black lines indicate the boundary of the infiltration zones. Leaves were harvested and  
528 photographed at 3 days post-infiltration (dpi).

529

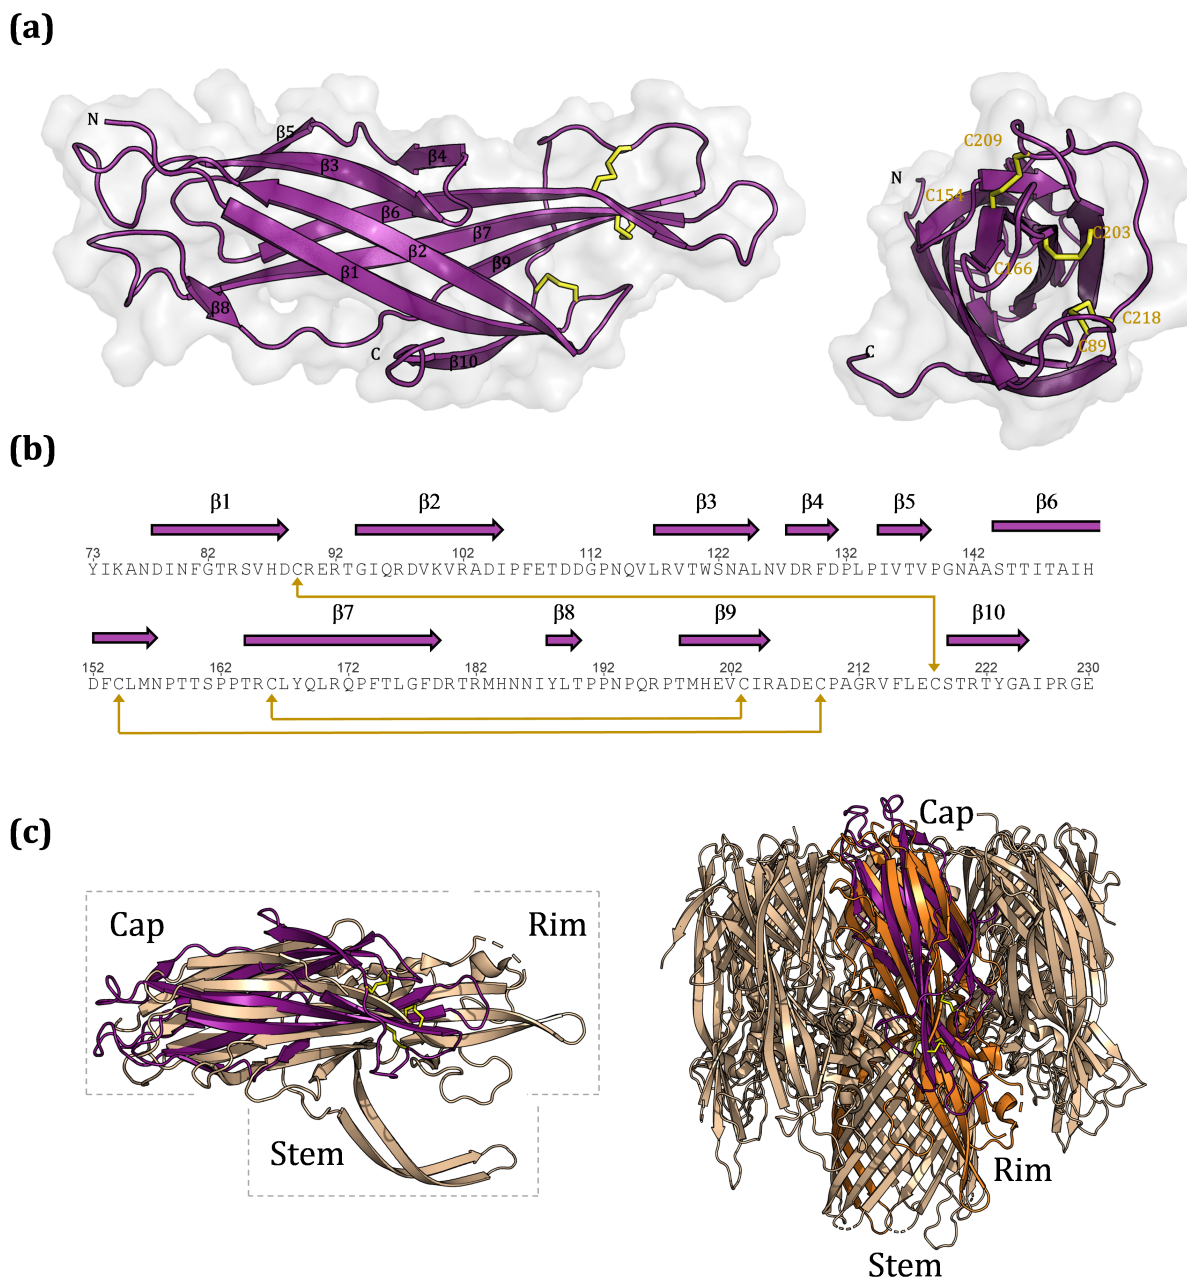

530

531 **Figure 3: Crystal structure of SnTox3 shows a novel effector fold.** (a) Ribbon diagram of  
 532 SnTox3, showing the overall  $\beta$ -barrel fold, with disulfide bonds shown in yellow. Disulfide-bond  
 533 connectivities are shown on the SnTox3 ribbon diagram, with the residues labelled accordingly.  
 534 (b) The amino-acid sequence of SnTox3, showing secondary structure elements; disulfide bond  
 535 connectivity is shown with gold lines. (c) Structure superimposition of SnTox3 (purple) and  
 536 LukGH (PDB ID: 4TW1; gold). Left panel: superposition of SnTox3 (purple) with one protomer  
 537 of LukGH (chain A), showing structural similarity with only the cap domain and not the rim and

538 stem domains, which are required for pore formation. Right panel: superimposition of SnTox3  
539 (purple) with one protomer (orange) in the pore complex of LukGH (gold).

540

(a)

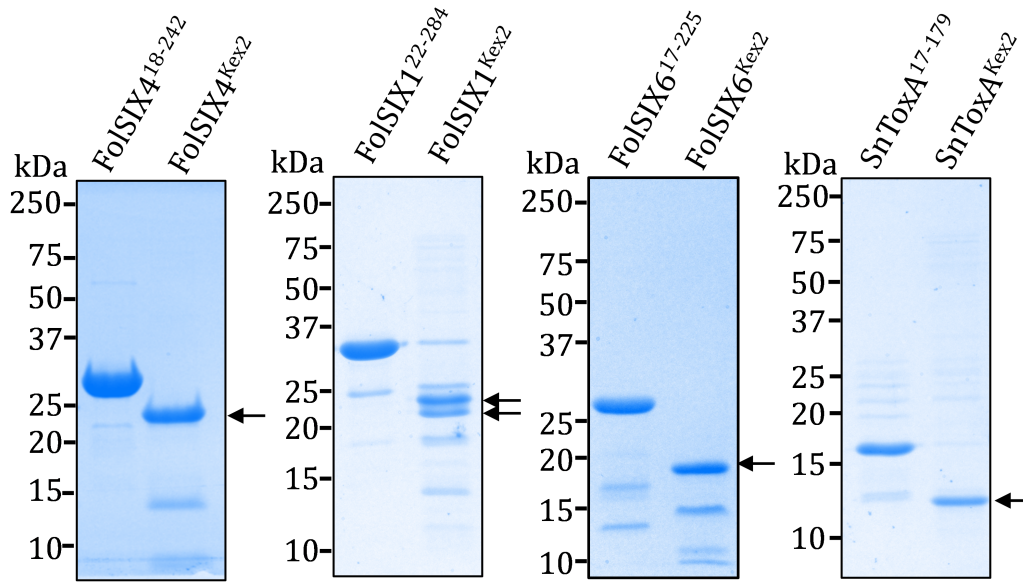

(b)

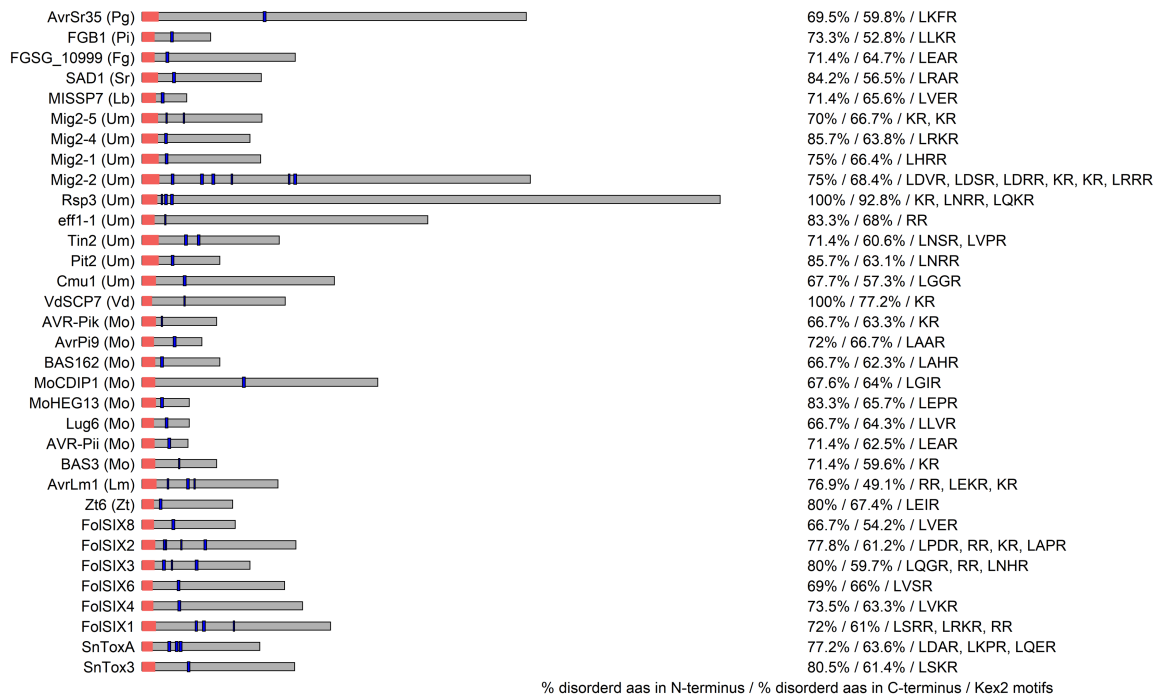

% disorder aas in N-terminus / % disorder aas in C-terminus / Kex2 motifs

541

542 **Figure 4: Fungal effectors with predicted Kex2-processed pro-domains.** (a) Coomassie-  
 543 stained SDS-PAGE gel showing *in vitro* Kex2-mediated cleavage of FolsIX6<sup>17-225</sup>, FolsIX4<sup>18-242</sup>,  
 544 FolsIX1<sup>22-284</sup>, and ToxA<sup>17-178</sup>. Numbers on the left-hand side indicate the sizes of molecular weight  
 545 markers (b) The 33 of 120 fungal effectors that are predicted to carry LxxR, KR or RR motifs that



546 are preceded by disordered domains using an *in-silico* approach. Effectors are shown with red  
547 boxes indicating the signal peptide region and blue boxes indicating the LxxR, KR or RR motifs.  
548 The fungal species from which the effector originates is indicated; *Puccinia graminis* (Pg),  
549 *Piriformospora indica* (Pi), *Fusarium graminearum* (Fg), *Sporisorium reilianum* (Sr), *Laccaria*  
550 *bicolor* (Lb), *Ustilago maydis* (Um), *Verticillium dahlia* (Vd), *Magnaporthe oryzae* (Mo),  
551 *Leptosphaeria maculans* (Lm), *Zymoseptoria tritici* (Zt), *Fusarium oxysporum f. sp. lycopersici*  
552 (Fol), and *Parastagonospora nodorum* (Sn). For each effector, the amino acid composition of the  
553 N-terminal region (sequence from signal peptide cleavage site to start of first Kex2 motif) and the  
554 C-terminal region (end of last Kex2 motif until end of sequence) are analysed. The proportion of  
555 disorder-promoting amino acids is shown on the right, along with all putative Kex2 cleavage sites  
556 that occur in the first half of the protein sequence.  
557

## 558 References

- 559 **Abeysekara NS, Friesen TL, Keller B, Faris JD. 2009.** Identification and characterization of a novel  
560 host–toxin interaction in the wheat–*Stagonospora nodorum* pathosystem. *Theoretical*  
561 *and Applied Genetics* **120**(1): 117-126.
- 562 **Adams PD, Afonine PV, Bunkóczy G, Chen VB, Davis IW, Echols N, Headd JJ, Hung L-W, Kapral**  
563 **GJ, Grosse-Kunstleve RW, et al. 2010.** PHENIX: a comprehensive Python-based system for  
564 macromolecular structure solution. *Acta Crystallographica Section D* **66**(Pt 2): 213-221.
- 565 **Afonine PV, Grosse-Kunstleve RW, Echols N, Headd JJ, Moriarty NW, Mustyakimov M,**  
566 **Terwilliger TC, Urzhumtsev A, Zwart PH, Adams PD. 2012.** Towards automated  
567 crystallographic structure refinement with phenix.refine. *Acta Crystallographica Section*  
568 *D* **68**(4): 352-367.
- 569 **Badarau A, Rouha H, Malafa S, Logan DT, Håkansson M, Stulik L, Dolezilkoval I, Teubenbacher**  
570 **A, Gross K, Maierhofer B, et al. 2015.** Structure-function analysis of heterodimer  
571 formation, oligomerization, and receptor binding of the *Staphylococcus aureus* bi-  
572 component toxin LukGH. *Journal of Biological Chemistry* **290**(1): 142-156.
- 573 **Bader O, Krauke Y, Hube B. 2008.** Processing of predicted substrates of fungal Kex2 proteinases  
574 from *Candida albicans*, *C. glabrata*, *Saccharomyces cerevisiae* and *Pichia pastoris*. *BMC*  
575 *Microbiology* **8**(1): 116.
- 576 **Baker D, Shiau AK, Agard DA. 1993.** The role of pro regions in protein folding. *Current Opinion in*  
577 *Cell Biology* **5**(6): 966-970.
- 578 **Ballance GM, Lamari L, Bernier CC. 1989.** Purification and characterization of a host-selective  
579 necrosis toxin from *Pyrenophora tritici-repentis*. *Physiological and Molecular Plant*  
580 *Pathology* **35**(3): 203-213.
- 581 **Basse CW, Kolb S, Kahmann R. 2002.** A maize-specifically expressed gene cluster in *Ustilago*  
582 *maydis*. *Molecular Microbiology* **43**(1): 75-93.
- 583 **Bendtsen JD, Nielsen H, von Heijne G, Brunak S. 2004.** Improved prediction of signal peptides:  
584 SignalP 3.0. *Journal of Molecular Biology* **340**(4): 783-795.
- 585 **Bevan A, Brenner C, Fuller RS. 1998.** Quantitative assessment of enzyme specificity *in vivo*: P2  
586 recognition by Kex2 protease defined in a genetic system. *Proceedings of the National*  
587 *Academy of Sciences of the United States of America* **95**(18): 10384.
- 588 **Blanchette JM, Abazeed ME, Fuller RS. 2004.** Cell-free reconstitution of transport from the trans-  
589 golgi network to the late endosome/prevacuolar compartment. *Journal of Biological*  
590 *Chemistry* **279**(47): 48767-48773.
- 591 **Blondeau K, Blaise F, Graille M, Kale SD, Linglin J, Ollivier B, Labarde A, Lazar N, Daverdin G,**  
592 **Balesdent MH, et al. 2015.** Crystal structure of the effector AvrLm4–7 of *Leptosphaeria*  
593 *maculans* reveals insights into its translocation into plant cells and recognition by  
594 resistance proteins. *The Plant Journal* **83**(4): 610-624.
- 595 **Breen S, Williams SJ, Winterberg B, Kobe B, Solomon PS. 2016.** Wheat PR-1 proteins are targeted  
596 by necrotrophic pathogen effector proteins. *The Plant Journal* **88**(1): 13-25.
- 597 **Buchan DWA, Jones DT. 2019.** The PSIPRED protein analysis workbench: 20 years on. *Nucleic*  
598 *Acids Research* **47**(W1): W402-W407.
- 599 **Ciuffetti LM, Tuori RP, Gaventa JM. 1997.** A single gene encodes a selective toxin causal to the  
600 development of tan spot of wheat. *The Plant Cell* **9**(2): 135-144.

- 601 **Crook AD, Friesen TL, Liu ZH, Ojiambo PS, Cowger C. 2012.** Novel necrotrophic effectors from  
602 *Stagonospora nodorum* and corresponding host sensitivities in winter wheat germplasm  
603 in the southeastern United States. *Phytopathology* **102**(5): 498-505.
- 604 **Davis IW, Murray LW, Richardson JS, Richardson DC. 2004.** MOLPROBITY: structure validation  
605 and all-atom contact analysis for nucleic acids and their complexes. *Nucleic Acids*  
606 *Research* **32**(Web Server issue): W615-619.
- 607 **de Guillen K, Ortiz-Vallejo D, Gracy J, Fournier E, Kroj T, Padilla A. 2015.** Structure analysis  
608 uncovers a highly diverse but structurally conserved effector family in phytopathogenic  
609 fungi. *PLoS Pathogens* **11**(10): e1005228.
- 610 **De la Concepcion JC, Franceschetti M, Maqbool A, Saitoh H, Terauchi R, Kamoun S, Banfield MJ.**  
611 **2018.** Polymorphic residues in rice NLRs expand binding and response to effectors of the  
612 blast pathogen. *Nature Plants* **4**(8): 576-585.
- 613 **Di X, Cao L, Hughes RK, Tintor N, Banfield MJ, Takken FLW. 2017.** Structure–function analysis of  
614 the *Fusarium oxysporum* Avr2 effector allows uncoupling of its immune-suppressing  
615 activity from recognition. *New Phytologist* **216**(3): 897-914.
- 616 **Emsley P, Lohkamp B, Scott WG, Cowtan K. 2010.** Features and development of Coot. *Acta*  
617 *Crystallographica Section D* **66**(Pt 4): 486-501.
- 618 **Evans PR, Murshudov GN. 2013.** How good are my data and what is the resolution? *Acta*  
619 *Crystallographica Section D* **69**(Pt 7): 1204-1214.
- 620 **Faris JD, Zhang Z, Lu H, Lu S, Reddy L, Cloutier S, Fellers JP, Meinhardt SW, Rasmussen JB, Xu**  
621 **SS, et al. 2010.** A unique wheat disease resistance-like gene governs effector-triggered  
622 susceptibility to necrotrophic pathogens. *Proceedings of the National Academy of*  
623 *Sciences of the United States of America* **107**(30): 13544-13549.
- 624 **Figuroa M, Hammond-Kosack KE, Solomon PS. 2018.** A review of wheat diseases—a field  
625 perspective. *Molecular Plant Pathology* **19**(6): 1523-1536.
- 626 **Franceschetti M, Maqbool A, Jiménez-Dalmaroni MJ, Pennington HG, Kamoun S, Banfield MJ.**  
627 **2017.** Effectors of filamentous plant pathogens: commonalities amid diversity.  
628 *Microbiology and Molecular Biology Reviews* **81**(2).
- 629 **Friesen TL, Chu C, Xu SS, Faris JD. 2012.** SnTox5–*Snn5*: a novel *Stagonospora nodorum* effector–  
630 wheat gene interaction and its relationship with the SnToxA–*Tsn1* and SnTox3–*Snn3*–*B1*  
631 interactions. *Molecular Plant Pathology* **13**(9): 1101-1109.
- 632 **Friesen TL, Meinhardt SW, Faris JD. 2007.** The *Stagonospora nodorum*-wheat pathosystem  
633 involves multiple proteinaceous host-selective toxins and corresponding host sensitivity  
634 genes that interact in an inverse gene-for-gene manner. *The Plant Journal* **51**(4): 681-692.
- 635 **Friesen TL, Stukenbrock EH, Liu Z, Meinhardt S, Ling H, Faris JD, Rasmussen JB, Solomon PS,**  
636 **McDonald BA, Oliver RP. 2006.** Emergence of a new disease as a result of interspecific  
637 virulence gene transfer. *Nat Genet* **38**(8): 953-956.
- 638 **Gao Y, Faris JD, Liu Z, Kim Y, Syme RA, Oliver RP, Xu SS, Friesen TL. 2015.** Identification and  
639 characterization of the SnTox6–*Snn6* interaction in the *Parastagonospora nodorum* -  
640 wheat pathosystem. *Molecular Plant-Microbe Interactions*: 615-625.
- 641 **Gil C, Dorca-Arévalo J, Blasi J. 2015.** *Clostridium perfringens* epsilon toxin binds to membrane  
642 lipids and its cytotoxic action depends on sulfatide. *PLoS One* **10**(10): e0140321.
- 643 **Guncar G, Wang C-IA, Forwood JK, Teh T, Catanzariti A-M, Ellis JG, Dodds PN, Kobe B. 2007.** The  
644 use of Co<sup>2+</sup> for crystallization and structure determination, using a conventional

- 645 monochromatic X-ray source, of flax rust avirulence protein. *Acta Crystallographica*  
646 *Section F* **63**(3): 209-213.
- 647 **Holm L, Rosenstrom P. 2010.** Dali server: conservation mapping in 3D. *Nucleic Acids Research*  
648 **38**(Web Server issue): W545-549.
- 649 **Houterman PM, Speijer D, Dekker HL, CG DEK, Cornelissen BJ, Rep M. 2007.** The mixed xylem  
650 sap proteome of *Fusarium oxysporum*-infected tomato plants. *Molecular Plant Pathology*  
651 **8**(2): 215-221.
- 652 **Hurlburt NK, Chen L-H, Stergiopoulos I, Fisher AJ. 2018.** Structure of the *Cladosporium fulvum*  
653 Avr4 effector in complex with (GlcNAc)<sub>6</sub> reveals the ligand-binding mechanism and  
654 uncouples its intrinsic function from recognition by the Cf-4 resistance protein. *PLoS*  
655 *Pathogens* **14**(8): e1007263.
- 656 **Iverson SV, Haddock TL, Beal J, Densmore DM. 2016.** CIDAR MoClo: Improved MoClo assembly  
657 standard and new *E. coli* part library enable rapid combinatorial design for synthetic and  
658 traditional biology. *ACS Synthetic Biology* **5**(1): 99-103.
- 659 **Jacob-Wilk D, Turina M, Kazmierczak P, Van Alfen NK. 2009.** Silencing of *Kex2* significantly  
660 diminishes the virulence of *Cryphonectria parasitica*. *Molecular Plant-Microbe*  
661 *Interactions* **22**(2): 211-221.
- 662 **Jia Y, McAdams SA, Bryan GT, Hershey HP, Valent B. 2000.** Direct interaction of resistance gene  
663 and avirulence gene products confers rice blast resistance. *The EMBO Journal* **19**(15):  
664 4004-4014.
- 665 **Jones DT. 1999.** Protein secondary structure prediction based on position-specific scoring  
666 matrices. *Journal of Molecular Biology* **292**(2): 195-202.
- 667 **Jones JDG, Dangl JL. 2006.** The plant immune system. *Nature* **444**(7117): 323-329.
- 668 **Kabsch W. 2010.** XDS. *Acta Crystallographica Section D* **66**(Pt 2): 125-132.
- 669 **Kettles GJ, Bayon C, Sparks CA, Canning G, Kanyuka K, Rudd JJ. 2018.** Characterization of an  
670 antimicrobial and phytotoxic ribonuclease secreted by the fungal wheat pathogen  
671 *Zymoseptoria tritici*. *New Phytologist* **217**(1): 320-331.
- 672 **Koebnik R, Locher KP, Van Gelder P. 2000.** Structure and function of bacterial outer membrane  
673 proteins: barrels in a nutshell. *Molecular Microbiology* **37**(2): 239-253.
- 674 **Le Marquer M, San Clemente H, Roux C, Savelli B, Frei dit Frey N. 2019.** Identification of new  
675 signalling peptides through a genome-wide survey of 250 fungal secretomes. *BMC*  
676 *Genomics* **20**(1): 64.
- 677 **Li Q, Yi L, Hoi KH, Marek P, Georgiou G, Iverson BL. 2017.** Profiling protease specificity: combining  
678 Yeast ER Sequestration Screening (YESS) with next generation sequencing. *ACS Chemical*  
679 *Biology* **12**(2): 510-518.
- 680 **Liu M, Duan L, Wang M, Zeng H, Liu X, Qiu D. 2016.** Crystal structure analysis and the  
681 identification of distinctive functional regions of the protein elicitor Mohrip2. *Frontiers in*  
682 *Plant Science* **7**(1103).
- 683 **Liu Z, Faris JD, Oliver RP, Tan KC, Solomon PS, McDonald MC, McDonald BA, Nunez A, Lu S,**  
684 **Rasmussen JB, et al. 2009.** SnTox3 acts in effector triggered susceptibility to induce  
685 disease on wheat carrying the *Snn3* gene. *PLoS Pathogens* **5**(9): e1000581.
- 686 **Liu Z, Zhang Z, Faris JD, Oliver RP, Syme R, McDonald MC, McDonald BA, Solomon PS, Lu S,**  
687 **Shelver WL, et al. 2012.** The cysteine rich necrotrophic effector SnTox1 produced by

- 688 *Stagonospora nodorum* triggers susceptibility of wheat lines harboring *Snn1*. *PLoS*  
689 *Pathogens* **8**(1): e1002467.
- 690 **Liu ZH, Faris JD, Meinhardt SW, Ali S, Rasmussen JB, Friesen TL. 2004.** Genetic and physical  
691 mapping of a gene conditioning sensitivity in wheat to a partially purified host-selective  
692 toxin produced by *Stagonospora nodorum*. *Phytopathology* **94**(10): 1056-1060.
- 693 **Ma L-S, Wang L, Trippel C, Mendoza-Mendoza A, Ullmann S, Moretti M, Carsten A, Kahnt J,**  
694 **Reissmann S, Zechmann B, et al. 2018.** The *Ustilago maydis* repetitive effector Rsp3  
695 blocks the antifungal activity of mannose-binding maize proteins. *Nature*  
696 *Communications* **9**(1): 1711.
- 697 **Maqbool A, Saitoh H, Franceschetti M, Stevenson CEM, Uemura A, Kanzaki H, Kamoun S,**  
698 **Terauchi R, Banfield MJ. 2015.** Structural basis of pathogen recognition by an integrated  
699 HMA domain in a plant NLR immune receptor. *eLife* **4**: e08709.
- 700 **McDonald MC, Solomon PS. 2018.** Just the surface: advances in the discovery and  
701 characterization of necrotrophic wheat effectors. *Current Opinion in Microbiology* **46**: 14-  
702 18.
- 703 **Menestrina G, Dalla Serra M, Comai M, Coraiola M, Viero G, Werner S, Colin DA, Monteil H,**  
704 **Prévost G. 2003.** Ion channels and bacterial infection: the case of  $\beta$ -barrel pore-forming  
705 protein toxins of *Staphylococcus aureus*. *FEBS Letters* **552**(1): 54-60.
- 706 **Mesarich CH, Bowen JK, Hamiaux C, Templeton MD. 2015.** Repeat-containing protein effectors  
707 of plant-associated organisms. *Frontiers in Plant Science* **6**(872).
- 708 **Müller O, Schreier PH, Uhrig JF. 2008.** Identification and characterization of secreted and  
709 pathogenesis-related proteins in *Ustilago maydis*. *Molecular Genetics and Genomics*  
710 **279**(1): 27-39.
- 711 **Murray GM, Brennan JP. 2009.** Estimating disease losses to the Australian wheat industry.  
712 *Australasian Plant Pathology* **38**(6): 558-570.
- 713 **Newport G, Agabian N. 1997.** KEX2 influences *Candida albicans* proteinase secretion and hyphal  
714 formation. *Journal of Biological Chemistry* **272**(46): 28954-28961.
- 715 **Newport G, Kuo A, Flattery A, Gill C, Blake JJ, Kurtz MB, Abruzzo GK, Agabian N. 2003.**  
716 Inactivation of Kex2p diminishes the virulence of *Candida albicans*. *Journal of Biological*  
717 *Chemistry* **278**(3): 1713-1720.
- 718 **Nyarko A, Singarapu KK, Figueroa M, Manning VA, Pandelova I, Wolpert TJ, Ciuffetti LM, Barbar**  
719 **E. 2014.** Solution NMR structures of *Pyrenophora tritici-repentis* ToxB and its inactive  
720 homolog reveal potential determinants of toxin activity. *Journal of Biological Chemistry*  
721 **289**(37): 25946-25956.
- 722 **Oliver RP, Friesen TL, Faris JD, Solomon PS. 2012.** *Stagonospora nodorum*: from pathology to  
723 genomics and host resistance. *Annual Review of Phytopathology* **50**(1): 23-43.
- 724 **Ose T, Oikawa A, Nakamura Y, Maenaka K, Higuchi Y, Satoh Y, Fujiwara S, Demura M, Sone T,**  
725 **Kamiya M. 2015.** Solution structure of an avirulence protein, AVR-Pia, from *Magnaporthe*  
726 *oryzae*. *Journal of Biomolecular NMR* **63**(2): 229-235.
- 727 **Parker MW, Feil SC. 2005.** Pore-forming protein toxins: from structure to function. *Progress in*  
728 *Biophysics and Molecular Biology* **88**(1): 91-142.
- 729 **Punt PJ, Drint-Kuijvenhoven A, Lokman BC, Spencer JA, Jeenes D, Archer DA, van den Hondel**  
730 **CA. 2003.** The role of the *Aspergillus niger* furin-type protease gene in processing of fungal

- 731 proproteins and fusion proteins. Evidence for alternative processing of recombinant  
732 (fusion-) proteins. *Journal of Biotechnology* **106**(1): 23-32.
- 733 **Redding K, Holcomb C, Fuller RS. 1991.** Immunolocalization of Kex2 protease identifies a putative  
734 late Golgi compartment in the yeast *Saccharomyces cerevisiae*. *Journal of Cell Biology*  
735 **113**(3): 527-538.
- 736 **Rep M. 2005.** Small proteins of plant-pathogenic fungi secreted during host colonization. *FEMS*  
737 *Microbiology Letters* **253**(1): 19-27.
- 738 **Rockwell NC, Fuller RS. 1998.** Interplay between S1 and S4 subsites in Kex2 protease: Kex2  
739 exhibits dual specificity for the P4 side chain. *Biochemistry* **37**(10): 3386-3391.
- 740 **Sánchez-Vallet A, Saleem-Batcha R, Kombrink A, Hansen G, Valkenburg D-J, Thomma BPHJ,**  
741 **Mesters JR. 2013.** Fungal effector Ecp6 outcompetes host immune receptor for chitin  
742 binding through intrachain LysM dimerization. *eLife* **2**: e00790.
- 743 **Sarma GN, Manning VA, Ciuffetti LM, Karplus PA. 2005.** Structure of Ptr ToxA: an RGD-containing  
744 host-selective toxin from *Pyrenophora tritici-repentis*. *The Plant Cell* **17**(11): 3190-3202.
- 745 **Savva CG, Fernandes da Costa SP, Bokori-Brown M, Naylor CE, Cole AR, Moss DS, Titball RW,**  
746 **Basak AK. 2013.** Molecular architecture and functional analysis of NetB, a pore-forming  
747 toxin from *Clostridium perfringens*. *The Journal of Biological Chemistry* **288**(5): 3512-3522.
- 748 **Shi G, Friesen TL, Saini J, Xu SS, Rasmussen JB, Faris JD. 2015.** The wheat *Snn7* gene confers  
749 susceptibility on recognition of the *Parastagonospora nodorum* necrotrophic effector  
750 SnTox7. *The Plant Genome* **8**(2).
- 751 **Shi G, Zhang Z, Friesen TL, Raats D, Fahima T, Brueggeman RS, Lu S, Trick HN, Liu Z, Chao W, et**  
752 **al. 2016.** The hijacking of a receptor kinase-driven pathway by a wheat fungal pathogen  
753 leads to disease. *Science Advances* **2**(10).
- 754 **Simbaqueba J, Catanzariti A-M, González C, Jones DA. 2018.** Evidence for horizontal gene  
755 transfer and separation of effector recognition from effector function revealed by analysis  
756 of effector genes shared between cape gooseberry- and tomato-infecting formae  
757 speciales of *Fusarium oxysporum*. *Molecular Plant Pathology* **19**(10): 2302-2318.
- 758 **Skubák P, Pannu NS. 2013.** Automatic protein structure solution from weak X-ray data. *Nature*  
759 *Communications* **4**: 2777.
- 760 **Sperschneider J, Dodds PN, Gardiner DM, Singh KB, Taylor JM. 2018.** Improved prediction of  
761 fungal effector proteins from secretomes with EffectorP 2.0. *Molecular Plant Pathology*  
762 **19**(9): 2094-2110.
- 763 **Tamm LK, Hong H, Liang B. 2004.** Folding and assembly of  $\beta$ -barrel membrane proteins.  
764 *Biochimica et Biophysica Acta - Biomembranes* **1666**(1): 250-263.
- 765 **Terwilliger TC, Grosse-Kunstleve RW, Afonine PV, Moriarty NW, Zwart PH, Hung L-W, Read RJ,**  
766 **Adams PD. 2008.** Iterative model building, structure refinement and density modification  
767 with the PHENIX AutoBuild wizard. *Acta Crystallographica Section D* **64**(1): 61-69.
- 768 **Tuori RP, Wolpert TJ, Ciuffetti LM. 2000.** Heterologous expression of functional Ptr ToxA.  
769 *Molecular Plant-Microbe Interactions* **13**(4): 456-464.
- 770 **Ve T, Williams SJ, Catanzariti A-M, Rafiqi M, Rahman M, Ellis JG, Hardham AR, Jones DA,**  
771 **Anderson PA, Dodds PN, et al. 2013.** Structures of the flax-rust effector AvrM reveal  
772 insights into the molecular basis of plant-cell entry and effector-triggered immunity.  
773 *Proceedings of the National Academy of Sciences of the United States of America* **110**(43):  
774 17594.

775 **Wang C-IA, Gunčar G, Forwood JK, Teh T, Catanzariti A-M, Lawrence GJ, Loughlin FE, Mackay**  
776 **JP, Schirra HJ, Anderson PA, et al. 2007.** Crystal structures of flax rust avirulence proteins  
777 AvrL567-A and -D reveal details of the structural basis for flax disease resistance  
778 specificity. *The Plant Cell* **19**(9): 2898.

779 **Weathers EA, Paulaitis ME, Woolf TB, Hoh JH. 2004.** Reduced amino acid alphabet is sufficient  
780 to accurately recognize intrinsically disordered protein. *FEBS Letters* **576**(3): 348-352.

781 **Wickner RB. 1974.** Chromosomal and nonchromosomal mutations affecting the "killer character"  
782 of *Saccharomyces cerevisiae*. *Genetics* **76**(3): 423-432.

783 **Winn MD, Ballard CC, Cowtan KD, Dodson EJ, Emsley P, Evans PR, Keegan RM, Krissinel EB,**  
784 **Leslie AGW, McCoy A, et al. 2011.** Overview of the CCP4 suite and current developments.  
785 *Acta Crystallographica Section D* **67**(Pt 4): 235-242.

786 **Wösten HA, Bohlmann R, Eckerskorn C, Lottspeich F, Bölker M, Kahmann R. 1996.** A novel class  
787 of small amphipathic peptides affect aerial hyphal growth and surface hydrophobicity in  
788 *Ustilago maydis*. *The EMBO Journal* **15**(16): 4274-4281.

789 **Zanin JP, Unsain N, Anastasia A. 2017.** Growth factors and hormones pro-peptides: the  
790 unexpected adventures of the BDNF prodomain. *Journal of Neurochemistry* **141**(3): 330-  
791 340.

792 **Zhang X, Farah N, Rolston L, Ericsson DJ, Catanzariti A-M, Bernoux M, Ve T, Bendak K, Chen C,**  
793 **Mackay JP, et al. 2018.** Crystal structure of the *Melampsora lini* effector AvrP reveals  
794 insights into a possible nuclear function and recognition by the flax disease resistance  
795 protein P. *Molecular Plant Pathology* **19**(5): 1196-1209.

796 **Zhang X, Nguyen N, Breen S, Outram MA, Dodds PN, Kobe B, Solomon PS, Williams SJ. 2017.**  
797 Production of small cysteine-rich effector proteins in *Escherichia coli* for structural and  
798 functional studies. *Molecular Plant Pathology* **18**(1): 141-151.

799 **Zhang Z-M, Zhang X, Zhou Z-R, Hu H-Y, Liu M, Zhou B, Zhou J. 2013.** Solution structure of the  
800 *Magnaporthe oryzae* avirulence protein AvrPiz-t. *Journal of Biomolecular NMR* **55**(2): 219-  
801 223.

802

803
